# Supplementary material for: Traditional Chinese Medicine Nursing Competency: Status and Influencing Factors Across Healthcare Settings
Source: Research Square preprint supplement (doi:10.21203/rs.3.rs-8033013/v1), 2025-12-08
Supplement: Supplementary file 1 [file fe168a175dd3814a469c8565.pdf]

## File S1 : Questionnaire on Traditional Chinese Medicine Nursing Competency and Training Needs of Nurses in Guangyuan City Healthcare Institutions

Greetings. We are researchers conducting a thematic study. Thank you very much for taking time out of your busy schedule to complete this questionnaire. This is an academic survey designed to investigate the current state of Traditional Chinese Medicine (TCM) nursing practices in Guangyuan City. The aim is to provide insights and recommendations for the development of TCM nursing in the region.

The questionnaire comprises three sections: Section I covers general demographic information, Section II assesses the current state of TCM nursing competency, and Section III identifies training needs in TCM nursing. Please read each item carefully and provide objective responses. Please note that there are no right or wrong answers. Your input is invaluable to this study, so please ensure you answer all items. We sincerely appreciate your cooperation.

Please select or provide your answer based on the question type. This survey is conducted anonymously. All data collected will be used solely for academic research and will be kept strictly confidential. Your responses will not be disclosed. Please feel assured in providing your answers.

The survey will be available from the date of distribution until December 1, 2024. To ensure data integrity, the system is configured to allow only one submission per IP address. We kindly request your careful and thoughtful responses.

### Section I covers general demographic information

#### 1.Type of hospital located

---

#### 2.Genger

☐Male

☐Female

#### 2.Age

☐20-30 years of age

☐31-40 years of age

☐41-50 years of age

☐51 years and over

#### 3.Length of service

☐0-5 years

☐6-10 years

☐11-15 years

☐16-20 years

☐More than 21 years

#### 4.Title

☐Primary

☐Intermediate

#### 5.Professional title of associate professor or above

☐Mode of employment

Be on regular payroll

☐ Not on regular payroll

6. Education attainment

☐ Secondary specialized school

☐ Junior college

☐ Bachelor degree or above

7. Number of nursing techniques in TCM

☐ 1-2 items

☐ 3-4 items

☐ More than 5 items

8. Which TCM nursing techniques are you capable of conducting? (Select all that apply)

☐ Moxibustion

☐ Acupoint injection

☐ Guasha

☐ Cupping therapy

☐ TCM enema

☐ Acupressure massage

☐ Acupoint application

☐ Auricular point sticking

☐ Wax therapy

☐ TCM soaking and washing

☐ Fumigation with TCM

☐ TCM Ironing

☐ TCM sealing package

☐ TCM application

☐ Ion introduction of Chinese medicine

☐ Rubbing with Chinese herbs

Section II assesses the current state of TCM nursing competency

Basic theoretical knowledge of TCM

| 1. Basic theoretical knowledge of TCM      | 1 (Very Unfamiliar) | 2 (Unfamiliar) | 3 (Neutral) | 4 (Familiar) | 5 (Very Familiar) |
|--------------------------------------------|---------------------|----------------|-------------|--------------|-------------------|
| Yin-yang and five elements                 |                     |                |             |              |                   |
| Theory of visceral manifestation           |                     |                |             |              |                   |
| Qi-blood-body fluid                        |                     |                |             |              |                   |
| Basic knowledge of meridians and acupoints |                     |                |             |              |                   |
| Etiology and pathogenesis                  |                     |                |             |              |                   |

Four diagnostic methods

Dialectic

Basic knowledge of TCM

Advantageous diseases

Basic knowledge of TCM

nursing

Common TCM nursing

Techniques

Interpretation of TCM

ancient books

| 2.Common TCM nursing techniques      | Common TCM nursing techniques |                |             |              |                   |
|--------------------------------------|-------------------------------|----------------|-------------|--------------|-------------------|
|                                      | 1 (Very Unfamiliar)           | 2 (Unfamiliar) | 3 (Neutral) | 4 (Familiar) | 5 (Very Familiar) |
| Moxibustion                          |                               |                |             |              |                   |
| Acupoint injection                   |                               |                |             |              |                   |
| Guasha                               |                               |                |             |              |                   |
| Cupping therapy                      |                               |                |             |              |                   |
| TCM enema                            |                               |                |             |              |                   |
| Acupressure massage                  |                               |                |             |              |                   |
| Acupoint application                 |                               |                |             |              |                   |
| Auricular point sticking             |                               |                |             |              |                   |
| Wax therapy                          |                               |                |             |              |                   |
| TCM soaking and washing              |                               |                |             |              |                   |
| Fumigation with TCM                  |                               |                |             |              |                   |
| TCM Ironing                          |                               |                |             |              |                   |
| TCM sealing package                  |                               |                |             |              |                   |
| TCM application                      |                               |                |             |              |                   |
| Ion introduction of Chinese medicine |                               |                |             |              |                   |
| Rubbing with Chinese herbs           |                               |                |             |              |                   |

Advanced TCM nursing clinical practice

| 3..Advanced TCM nursing clinical practice       | 1 (Very Unfamiliar) | 2 (Unfamiliar) | 3 (Neutral) | 4 (Familiar) | 5 (Very Familiar) |
|-------------------------------------------------|---------------------|----------------|-------------|--------------|-------------------|
| TCM nursing checkup                             |                     |                |             |              |                   |
| TCM chronic disease management                  |                     |                |             |              |                   |
| Evidence-based practice in TCM nursing          |                     |                |             |              |                   |
| Research on the technical specifications of TCM |                     |                |             |              |                   |
| Diagnosis and treatment of specialized diseases |                     |                |             |              |                   |
| Advantageous disease                            |                     |                |             |              |                   |
| TCM nursing program argumentation               |                     |                |             |              |                   |
| New advances in nursing research in TCM         |                     |                |             |              |                   |

### Section III identifies training needs in TCM nursing

#### 1.Level of willingness to train

- ☐Extremely resistant
- ☐Resistant
- ☐Indifferent
- ☐accept
- ☐Willing to accept

#### 2.Level of emphasis on training

- ☐Extremely neglected
- ☐Neglected
- ☐Normal
- ☐Follow with interest
- ☐Positive attention

#### 3.Number of trainings

- ☐Extremely lacking
- ☐Not enough
- ☐Unclear
- ☐Just enough

#### 4.Regarding training methods for TCM nursing theory, which of the following are your preferred formats? (Select all that apply)

- ☐Flipped Classroom (The instructor identifies problems; students explore independently and collaboratively, then exchange outcomes in class)

☐ Problem-Based Learning (PBL) Scenario Teaching (Instructor provides a clinical case → students identify issues → students seek solutions and study independently → class resolves problems based on findings, followed by instructor's summary)

☐ Group Discussion

☐ Case Analysis

☐ Micro-lectures (Online learning)

☐ Self-directed Learning

☐ 5-Minute Q&A during Morning Handover

☐ Comprehensive Competency Training at Bedside

5. Regarding training methods for TCM nursing practical techniques, which of the following are your preferred formats? (Select all that apply)

☐ Live Demonstration

☐ Flipped Classroom

☐ Role-Playing

☐ Practical Skills Competition

☐ Micro-lectures or Video Demonstrations

☐ Comprehensive Competency Training at Bedside

6. Which of the following areas do you believe are your most critical training needs in Traditional Chinese Medicine (TCM) nursing? (Select all that apply) [Multiple Choice]

☐ Basic Theories of Traditional Chinese Medicine

☐ Fundamental Theories of TCM Nursing

☐ Knowledge of TCM Health Preservation and Wellness

☐ TCM Dietotherapy (Nutritional Therapy)

☐ TCM Nursing Techniques

☐ TCM Nursing Routines and Protocols

☐ TCM-Based Patient Condition Observation

☐ Documentation of TCM Nursing Care

☐ TCM Nursing Ward Rounds

☐ Syndrome Differentiation and Specialized Care for Specific Diseases

☐ TCM Nursing Protocols for Priority Diseases

☐ Latest Research Advances in TCM Nursing

☐ TCM Nursing for Chronic Disease Management
